# Supplementary material for: Design of a robust and strong-acid MOF platform for selective ammonium recovery and proton conductivity
Source: Royal Society of Chemistry journal article supplement (doi:10.1039/d3sc02743k), 2023-01-01
Supplement: d3sc02743k1.pdf [file d3sc02743k1.pdf]

## Electronic Supplementary Information

# Design of a Robust and Strong-Acid MOF Platform for the Selective Ammonium Recovery and Proton Conductivity

Genki Hatakeyama,<sup>a</sup> Hongyao Zhou,<sup>a</sup> Takashi Kikuchi,<sup>b</sup> Masaki Nishio,<sup>a</sup> Kouki Oka,<sup>a</sup> Masaaki Sadakiyo,<sup>c</sup> Yusuke Nishiyama,<sup>d</sup> and Teppei Yamada<sup>\*a</sup>

---

<sup>a</sup> Division of Chemistry, Graduate School of Science  
The University of Tokyo  
7-3-1 Hongo, Bunkyo-ku, Tokyo, 113-0033, Japan  
E-mail: teppei@chem.s.u-tokyo.ac.jp

<sup>b</sup> Rigaku Corporation  
3-9-12 Matsubaracho, Akishima, Tokyo, 196-8666, Japan

<sup>c</sup> Department of Applied Chemistry, Faculty of Science Division I  
Tokyo University of Science  
1-3 Kagurazaka, Shinjuku-ku, Tokyo, 162-8601, Japan

<sup>d</sup> Nano-Crystallography Unit. RIKEN-JEOL Collaboration Center  
RIKEN  
Yokohama, Kanagawa, 230-0045, Japan; JEOL RESONANCE Inc., Akishima, Tokyo, 196-8558, Japan

**Abstract:** Metal–organic frameworks (MOFs) are potential candidates for the platform of the solid acid; however, no MOF has been reported, which has both aqueous ammonium stability and a strong acid site. This manuscript reports a highly stable MOF with a cation exchange site synthesized by the reaction between zirconium and mellitic acid under a high concentration of ammonium cation ( $\text{NH}_4^+$ ). Single-crystal XRD analysis of the MOF revealed the presence of four free carboxyl groups of the mellitic acid ligand, and the high first association constant ( $pK_{a1}$ ) of one of the carboxyl groups acts as a monovalent ion-exchanging site.  $\text{NH}_4^+$  in the MOF can be reversibly exchanged with proton ( $\text{H}^+$ ), sodium ( $\text{Na}^+$ ), and potassium ( $\text{K}^+$ ) cations in an aqueous solution. Moreover, the uniform nanospace of the MOF provides the acid site for a selective  $\text{NH}_4^+$  recovery from the aqueous mixture of  $\text{NH}_4^+$  and  $\text{Na}^+$ , which could be beneficial to the global nitrogen cycle problem. The solid acid nature of the MOF also results in the proton conductivity up to  $1.34 \times 10^{-3} \text{ S} \cdot \text{cm}^{-1}$  at 55 °C by its ion exchange from  $\text{NH}_4^+$  to  $\text{H}^+$ .

## Table of Contents

|                                                                                                                         |           |
|-------------------------------------------------------------------------------------------------------------------------|-----------|
| <b>1. Synthesis</b> .....                                                                                               | <b>3</b>  |
| <b>2. Elemental Analysis</b> .....                                                                                      | <b>3</b>  |
| <b>3. SEM images</b> .....                                                                                              | <b>4</b>  |
| <b>4. Single-Crystal XRD Analysis</b> .....                                                                             | <b>5</b>  |
| Crystallographic data .....                                                                                             | 5         |
| Comparison of the structure between UiO-66 and Zr-mel-NH <sub>4</sub> .....                                             | 6         |
| <b>5. Thermogravimetric Analysis</b> .....                                                                              | <b>7</b>  |
| <b>6. Nitrogen Gas Adsorption Analysis</b> .....                                                                        | <b>8</b>  |
| Saito–Foley pore size analysis .....                                                                                    | 8         |
| BET surface area .....                                                                                                  | 9         |
| PXRD patterns after nitrogen gas adsorption experiment .....                                                            | 10        |
| <b>7. Screening of NH<sub>4</sub><sup>+</sup> Stability for Various MOFs</b> .....                                      | <b>11</b> |
| UiO-66-(COOH) <sub>2</sub> .....                                                                                        | 11        |
| UiO-66-SO <sub>3</sub> Na .....                                                                                         | 12        |
| Zirconium sulfoterephthalate MOF .....                                                                                  | 12        |
| <b>8. SEM-EDX Analysis</b> .....                                                                                        | <b>13</b> |
| <b>9. Ion-Exchange Study</b> .....                                                                                      | <b>14</b> |
| Exchange rate from H <sup>+</sup> to X (X = NH <sub>4</sub> <sup>+</sup> , Na <sup>+</sup> , and K <sup>+</sup> ) ..... | 14        |
| Cycle test between H <sup>+</sup> and NH <sub>4</sub> <sup>+</sup> .....                                                | 14        |
| PXRD patterns after cycle test .....                                                                                    | 15        |
| SEM image of the sample after cycle test .....                                                                          | 15        |
| Equilibrium constant of Zr-mel-H for X (X = NH <sub>4</sub> <sup>+</sup> , Na <sup>+</sup> , and K <sup>+</sup> ) ..... | 16        |
| NH <sub>4</sub> <sup>+</sup> /K <sup>+</sup> adsorption selectivity .....                                               | 16        |
| <b>10. Proton Conductivity</b> .....                                                                                    | <b>17</b> |
| Measurement set up .....                                                                                                | 17        |
| Equivalent circuit fitting .....                                                                                        | 18        |
| Temperature dependency of Nyquist plot .....                                                                            | 18        |
| Humidity dependency of Nyquist plot .....                                                                               | 19        |
| Humidity dependency of proton conductivity .....                                                                        | 21        |
| PXRD patterns after placed under proton conductivity measurement condition .....                                        | 22        |

## 1. Synthesis

ZrOCl<sub>2</sub>·8H<sub>2</sub>O, ammonium chloride, sodium chloride, potassium chloride, and acetic acid were purchased from FUJIFILM Wako Chemicals. Mellitic acid was purchased from Tokyo Chemical Industry. Concentrated hydrochloric acid was purchased from Kanto Chemical Co., Inc.

A solution of ZrOCl<sub>2</sub>·8H<sub>2</sub>O (129 mg, 0.40 mmol) in 24 mL of acetic acid was added to a solution of mellitic acid (2053 mg, 6.0 mmol) and ammonium chloride (5930 mg, 111 mmol) in 24 mL of water. The mixture was heated at 80 °C for 72 hours by hydrothermal synthesis to obtain a white crystalline powder. The as-synthesized powder was then washed five times with distilled water to remove unreacted reagent, washed with EtOH and ether, and then dried in vacuum at room temperature.

The single crystal was obtained by using similar methods. A solution of ZrOCl<sub>2</sub>·8H<sub>2</sub>O (32 mg, 0.10 mmol) in 10 mL of acetic acid was added to a suspension of mellitic acid (513 mg, 1.5 mmol) and ammonium chloride (1200 mg, 22 mmol) in 2 mL of water. The mixture was heated at 100 °C for a week by hydrothermal synthesis to obtain a white crystalline powder.

## 2. Elemental Analysis

**Table S1.** The result of elemental analysis of Zr-mel-X (X = NH<sub>4</sub>, H, Na, K)

|                        | Chemical Formula                                                                                                                                                                     | C: calc<br>(obs) | H: calc<br>(obs) | N: calc<br>(obs) |
|------------------------|--------------------------------------------------------------------------------------------------------------------------------------------------------------------------------------|------------------|------------------|------------------|
| Zr-mel-NH <sub>4</sub> | Zr <sub>6</sub> O <sub>4</sub> (OH) <sub>4</sub> (L-NH <sub>4</sub> ) <sub>3.60</sub><br>(CH <sub>3</sub> CO <sub>2</sub> ) <sub>2.4</sub> 36H <sub>2</sub> O                        | 20.90<br>(20.75) | 3.97<br>(3.55)   | 1.83<br>(1.86)   |
| Zr-mel-H               | Zr <sub>6</sub> O <sub>4</sub> (OH) <sub>4</sub> (L-H) <sub>3.55</sub> (L-NH <sub>4</sub> ) <sub>0.05</sub><br>(CH <sub>3</sub> CO <sub>2</sub> ) <sub>2.4</sub> 24H <sub>2</sub> O  | 22.07<br>(21.97) | 2.85<br>(2.87)   | 0.03<br>(0.28)   |
| Zr-mel-Na              | Zr <sub>6</sub> O <sub>4</sub> (OH) <sub>4</sub> (L-Na) <sub>2.98</sub> (L-NH <sub>4</sub> ) <sub>0.62</sub><br>(CH <sub>3</sub> CO <sub>2</sub> ) <sub>2.4</sub> 42H <sub>2</sub> O | 20.03<br>(20.03) | 3.80<br>(3.48)   | 0.30<br>(0.40)   |
| Zr-mel-K               | Zr <sub>6</sub> O <sub>4</sub> (OH) <sub>4</sub> (L-K) <sub>3.43</sub> (L-NH <sub>4</sub> ) <sub>0.17</sub><br>(CH <sub>3</sub> CO <sub>2</sub> ) <sub>2.4</sub> 42H <sub>2</sub> O  | 19.64<br>(19.33) | 3.66<br>(3.15)   | 0.08<br>(0.35)   |

(L-NH<sub>4</sub>: C<sub>12</sub>H<sub>3</sub>O<sub>12</sub>(NH<sub>4</sub>), L-H: C<sub>12</sub>H<sub>3</sub>O<sub>12</sub>(H), L-Na : C<sub>12</sub>H<sub>3</sub>O<sub>12</sub>(Na), L-K : C<sub>12</sub>H<sub>3</sub>O<sub>12</sub>(K))

### 3. SEM Images

SEM observation was performed using a JEOL Ltd. JSM-7500FA. The measurements were carried out at an acceleration voltage of 3 keV and a working distance of 8.0 mm. Samples were placed on carbon tape on an aluminum stage and coated with ~2 nm of osmium.

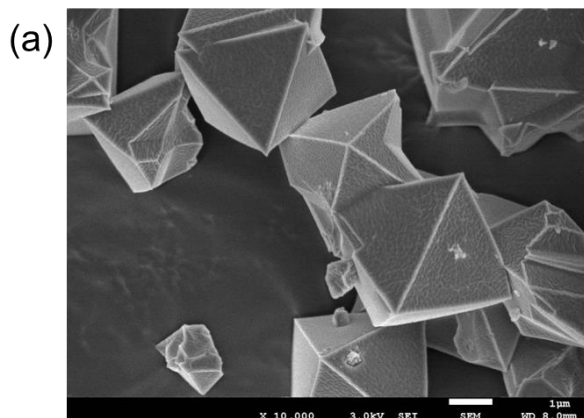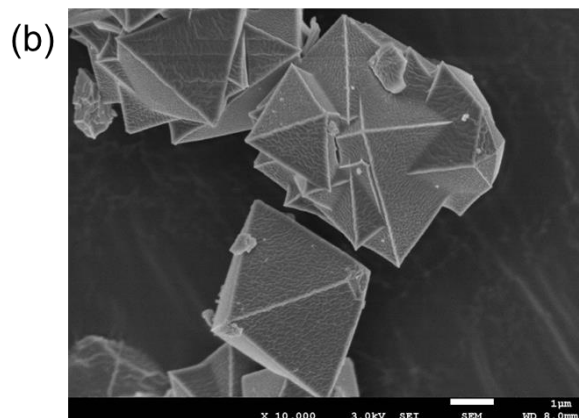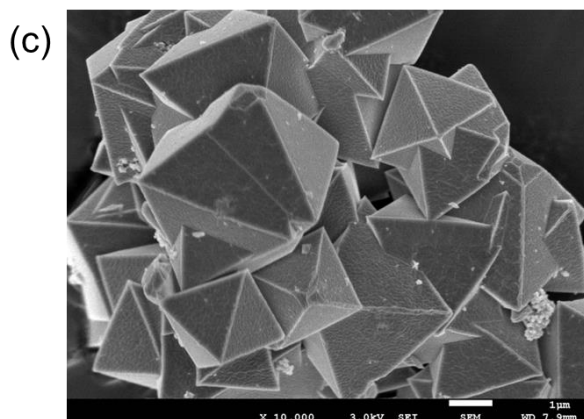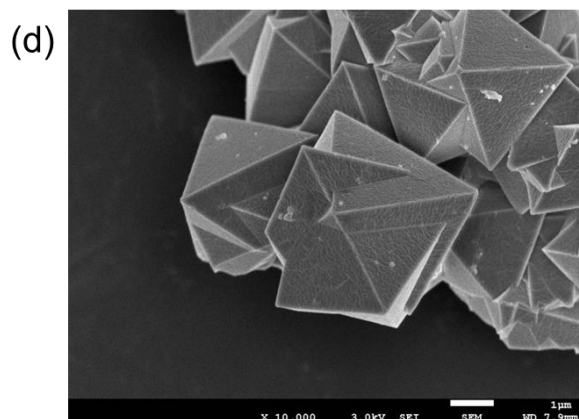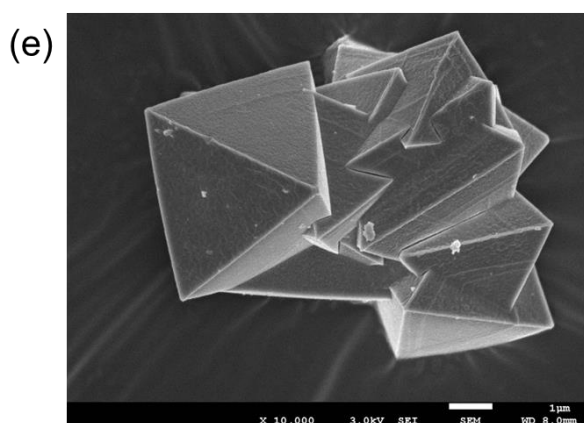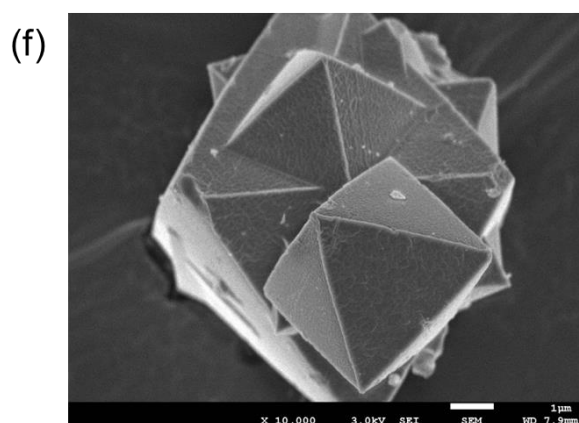

**Fig. S1** SEM images of (a) pristine Zr-mel-NH<sub>4</sub> and Zr-mel-NH<sub>4</sub> after soaked in (b) 60 mM NH<sub>4</sub>Cl, (c) 60 mM NaCl, (d) 60 mM KCl, (e) pH 0 HCl, and (f) pH 10 NaOH aqueous solutions.

## 4. Single-Crystal XRD Analysis

Single-crystal XRD data were collected on an XtaLAB PRO P200 (Rigaku Oxford Diffraction) diffractometer equipped with a rotation anode Mo  $K\alpha$  radiation source ( $\lambda = 0.71073 \text{ \AA}$ ), a hybrid pixel array detector (HPAD), and a low-temperature system using cold nitrogen stream. Collected data were integrated, corrected, and scaled by the program CrysAlisPro ver. 1.171.41.119a. Empirical absorption correction was applied in this process. The crystal structure was solved using SHELXT ver. 2018/2 and refined using SHELXL ver. 2018/3 programs.<sup>S1,2</sup>

**Table S2.** Crystallographic data of Zr-mel-NH<sub>4</sub>

|                                                    |                                                                  |
|----------------------------------------------------|------------------------------------------------------------------|
| Temperature / K                                    | 93                                                               |
| Wavelength / $\text{\AA}$                          | 0.71069                                                          |
| Formula                                            | $\text{C}_{37}\text{O}_{57.67}\text{Zr}_5$                       |
| Formula weight                                     | 1823.14                                                          |
| Crystal system                                     | cubic                                                            |
| Space group                                        | $Im\bar{3}m$                                                     |
| $a$ / $\text{\AA}$                                 | 41.547(2)                                                        |
| $V$ / $\text{\AA}^3$                               | 71714(10)                                                        |
| $Z$                                                | 24                                                               |
| Calculated density / $\text{g}\cdot\text{cm}^{-3}$ | 1.013                                                            |
| $\theta$ range                                     | $1.834^\circ \sim 29.302^\circ$                                  |
| Crystal form                                       | Octahedral                                                       |
| Crystal color                                      | colorless                                                        |
| Crystal size                                       | $0.01 \times 0.01 \times 0.01$                                   |
| $h$ range                                          | $-51 \sim 56$                                                    |
| $k$ range                                          | $-56 \sim 55$                                                    |
| $l$ range                                          | $-56 \sim 55$                                                    |
| Weighting scheme                                   | $w = [\sigma^2(F_o^2) + (0.1485P)^2]$ , $P = (F_o^2 + 2F_c^2)/3$ |
| $F_{(000)}$ *                                      | 21200                                                            |
| $R_1$ **                                           | 8.26%                                                            |
| $wR_2$ ***                                         | 28.24%                                                           |
| $R_{\text{int}}$                                   | 26.47%                                                           |
| GOF****                                            | 1.047                                                            |

\* $F_{(000)} = (f_r + f_i)^{1/2}$  where  $f_r$  and  $f_i$  are the real part and imaginary part of the scattering factors at theta = 0 degrees, respectively.

\*\* $R_1 = (\sum ||F_o| - |F_c||) / \sum |F_o|$  for observed reflections, where  $F_o$  and  $F_c$  are the observed and calculated normalized factor, respectively.

\*\*\* $wR_2 = [\{\sum(w(F_o^2 - F_c^2)^2)\} / \sum(w(F_o^2)^2)]^{1/2}$  for independent reflections.

\*\*\*\*GOF =  $[\{\sum(w(F_o^2 - F_c^2)^2)\} / (n-p)]^{1/2}$  where  $n$  and  $p$  are the number of the reflection and the parameters in the refinement, respectively.

#### 4. Single-Crystal XRD Analysis (continued)

(a)

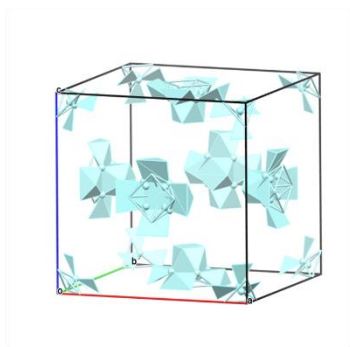

(b)

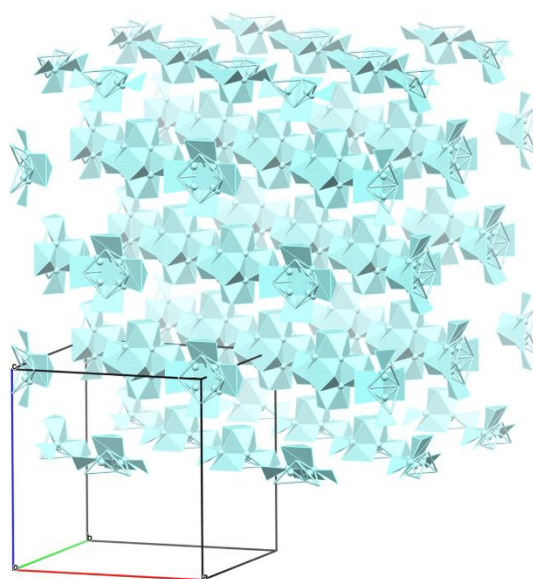

(c)

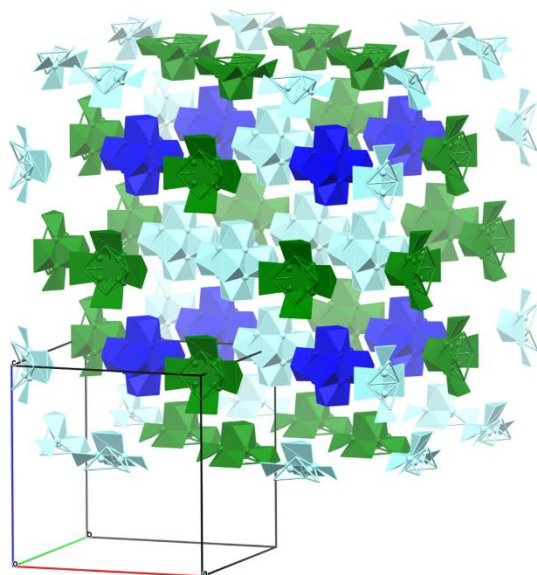

(d)

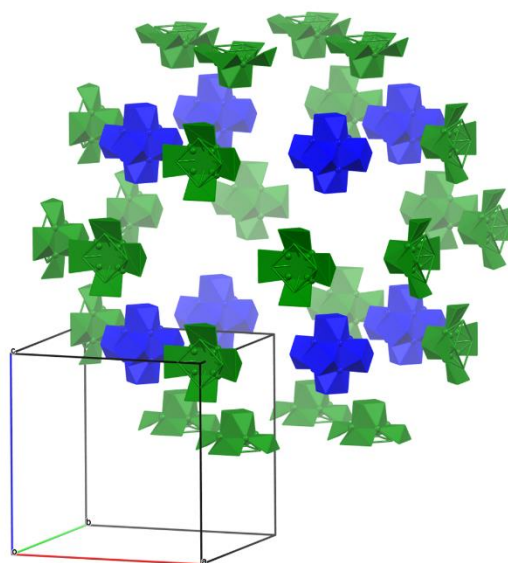

**Fig. S2** The crystal structures of UiO-66 and Zr-mel-NH<sub>4</sub>. The arrangement of Zr<sub>6</sub>O<sub>8</sub> clusters (pale blue) (a) in the unit cell of UiO-66, (b) in the extended lattice of UiO-66 in the range from (0, 0, 0.5) to (2, 2, 2.5). (c) The clusters are classified into Type I (blue), Type II (green) and defects (pale blue) in the Zr-mel-NH<sub>4</sub>. The ratio of Type I:Type II:defect is 8:8:12. (d) The arrangement of Zr<sub>6</sub>O<sub>8</sub> clusters of Zr-mel-NH<sub>4</sub>.

## 5. Thermogravimetric Analysis

Thermogravimetric analysis was conducted using a DTG-60 (SHIMADZU). The samples in aluminum pans were heated from RT to 500 °C at 5 °C·min<sup>-1</sup> under nitrogen flow.

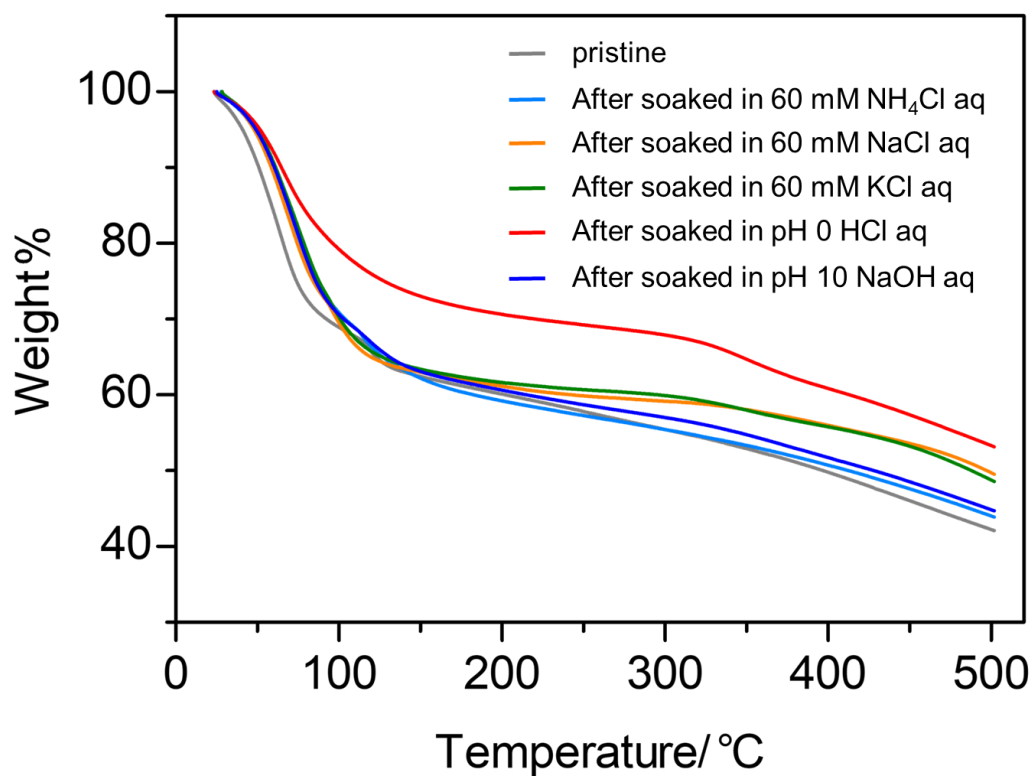

**Fig. S3** TG curves of pristine Zr-mel-NH<sub>4</sub> and Zr-mel-NH<sub>4</sub> after soaked in various aqueous solutions.

## 6. Nitrogen Gas Adsorption Study

Nitrogen gas adsorption analysis was performed by a BELSORP-Max (BEL Japan) using nitrogen gas ( $\geq 99.9995\%$ ) at 77 K with a liquid nitrogen bath. The samples were activated by reducing pressure at room temperature and purging with nitrogen gas. This process was repeated three times.

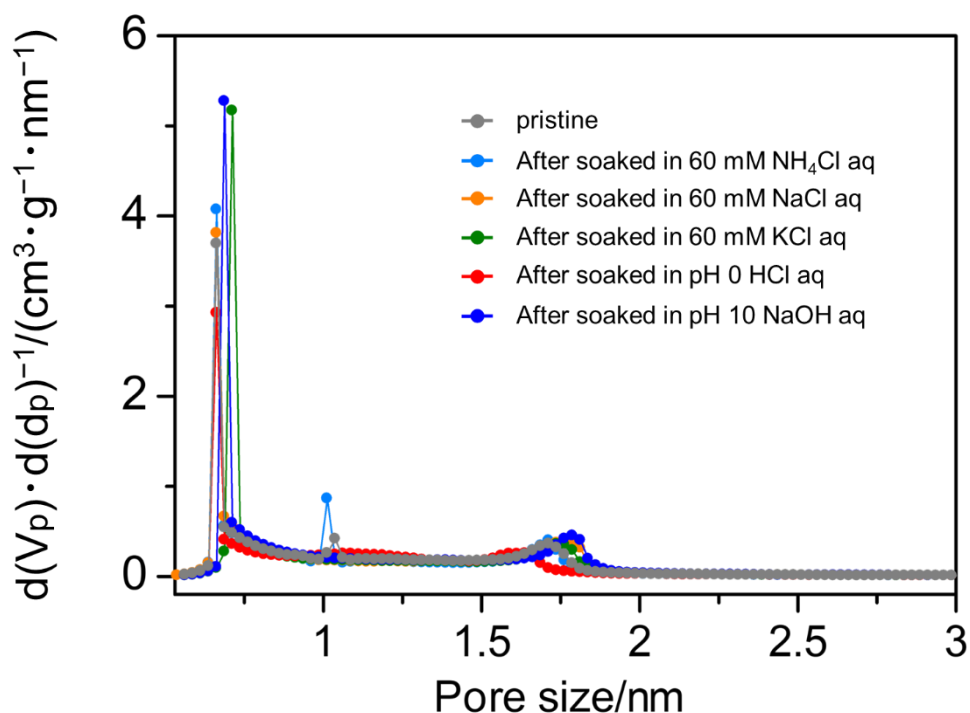

**Fig. S4** Saito-Foley pore size analysis of pristine Zr-mel-NH<sub>4</sub> and Zr-mel-NH<sub>4</sub> after soaked in various aqueous solutions.

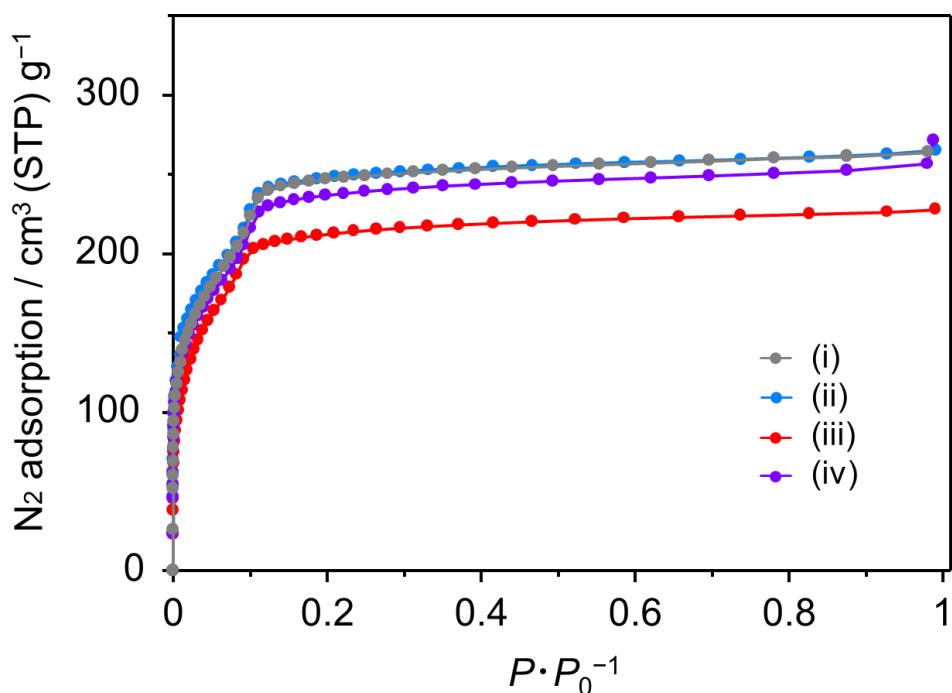

**Fig. S5** Nitrogen gas adsorption isotherms of Zr-mel MOFs. (i) pristine Zr-mel-NH<sub>4</sub> (grey), (ii) after soaking (i) in 60 mM NH<sub>4</sub>Cl (light blue), (iii) (ii) soaked in HCl (pH 0) (red), (iv) (iii) soaked in 60 mM NH<sub>4</sub>Cl (purple).



**Table S3.** BET surface area of pristine Zr-mel-NH<sub>4</sub> and Zr-mel-NH<sub>4</sub> after soaked in various aqueous solutions.

| Sample                                                                        | BET surface area / m <sup>2</sup> ·g <sup>-1</sup> | Reference         |
|-------------------------------------------------------------------------------|----------------------------------------------------|-------------------|
| Pristine Zr-mel-NH <sub>4</sub>                                               | 876                                                | This work         |
| Zr-mel-NH <sub>4</sub> after soaked in 60 mM NH <sub>4</sub> Cl <sub>aq</sub> | 892                                                |                   |
| Zr-mel-NH <sub>4</sub> after soaked in 60 mM NaCl <sub>aq</sub>               | 897                                                |                   |
| Zr-mel-NH <sub>4</sub> after soaked in 60 mM KCl <sub>aq</sub>                | 887                                                |                   |
| Zr-mel-NH <sub>4</sub> after soaked in pH 0 HCl <sub>aq</sub>                 | 845                                                |                   |
| Zr-mel-NH <sub>4</sub> after soaked in pH 10 NaOH <sub>aq</sub>               | 978                                                |                   |
| UiO-66                                                                        | 769                                                | Ref <sup>S3</sup> |
| UiO-66 (solvothermal)                                                         | 1525                                               |                   |
| UiO-66-(COOH) <sub>2</sub>                                                    | 491                                                |                   |
| UiO-66-(COOH) <sub>4</sub>                                                    | 212                                                |                   |

## 6. PXRD patterns After Nitrogen Gas Adsorption Experiment

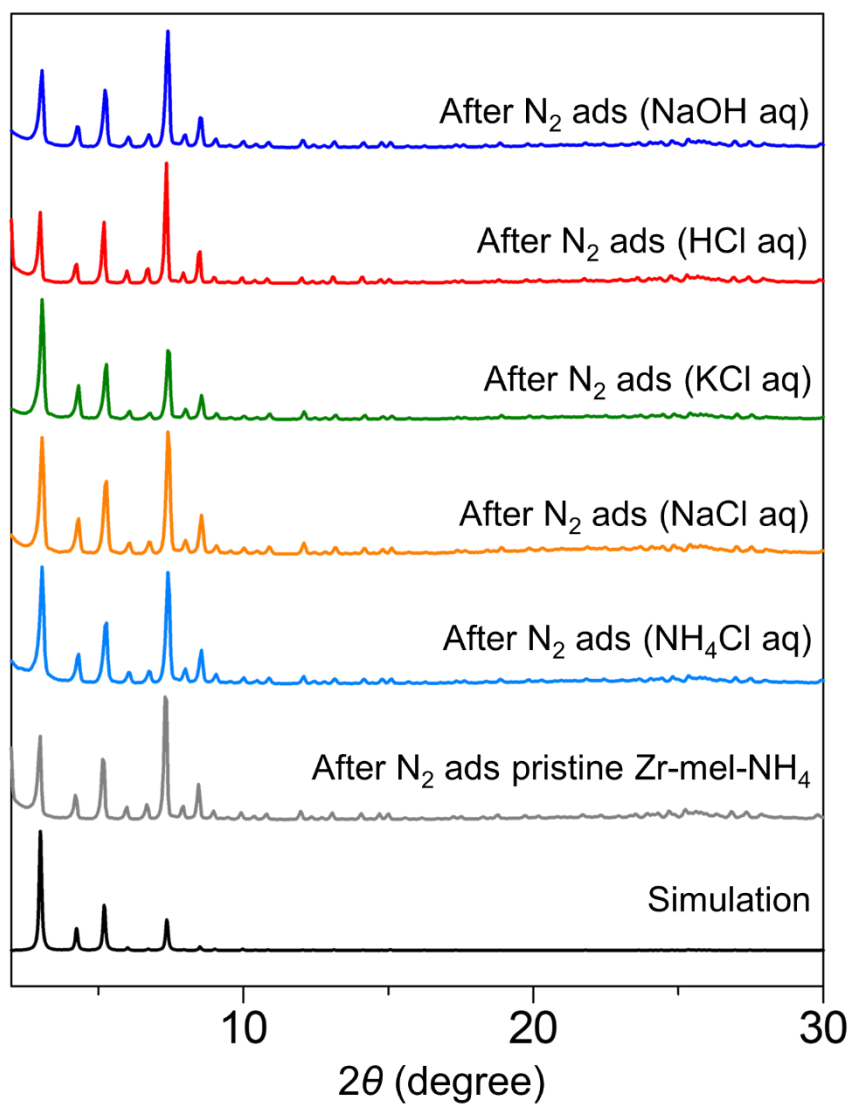

**Fig. S6** PXRD patterns of Zr-mel-NH<sub>4</sub> after nitrogen gas adsorption experiment soaked in each aqueous solution.

## 7. Screening of $\text{NH}_4^+$ Stability for Various MOFs

UiO-66-(COOH)<sub>2</sub>, UiO-66-SO<sub>3</sub>Na, and zirconium sulfoterephthalate MOF were synthesized according to the previous reports<sup>S4-6</sup> and were soaked in an aqueous  $\text{NH}_4\text{Cl}$  solution to evaluate the  $\text{NH}_4^+$  stability.

20 mg of UiO-66-(COOH)<sub>2</sub> and UiO-66-SO<sub>3</sub>Na were soaked in 20 mL of aqueous  $\text{NH}_4\text{Cl}$  solution (30 mM) at 30 °C for 3 h. Zirconium sulfoterephthalate MOF was also immersed in  $\text{NH}_4\text{Cl}$  solution for 1 h under same conditions. Each sample was collected by centrifugation and washed with water to measure the PXRD patterns.

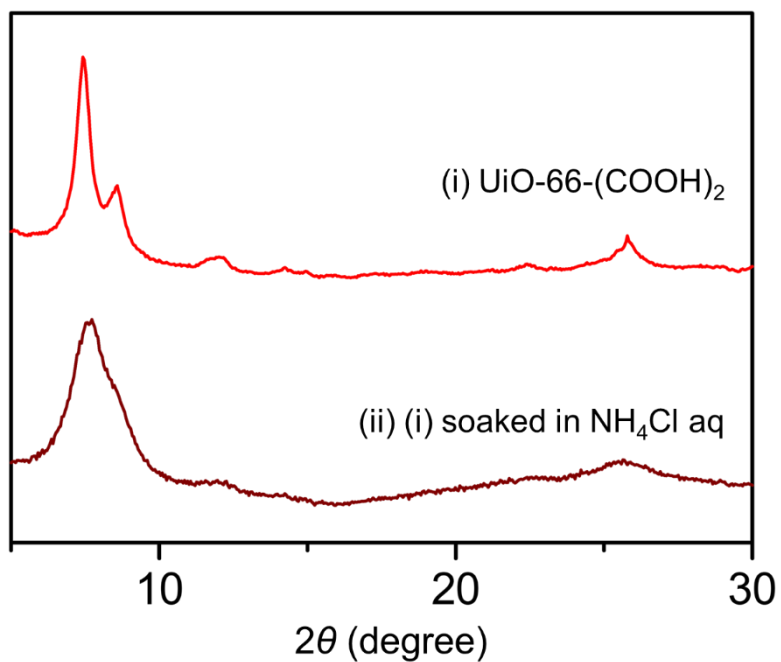

**Fig. S7** PXRD patterns of UiO-66-(COOH)<sub>2</sub> (i) before and (ii) after soaked in  $\text{NH}_4\text{Cl}$  aqueous solutions.

## 7. Screening of $\text{NH}_4^+$ Stability for Various MOFs (continued)

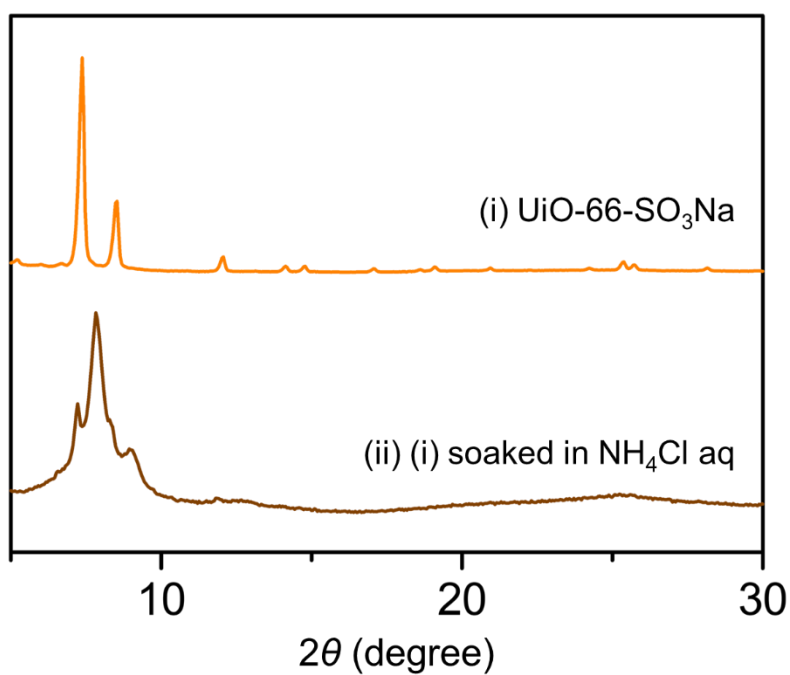

**Fig. S8** PXRD patterns of UiO-66-SO<sub>3</sub>Na (i) before and (ii) after soaked in NH<sub>4</sub>Cl aqueous solutions.

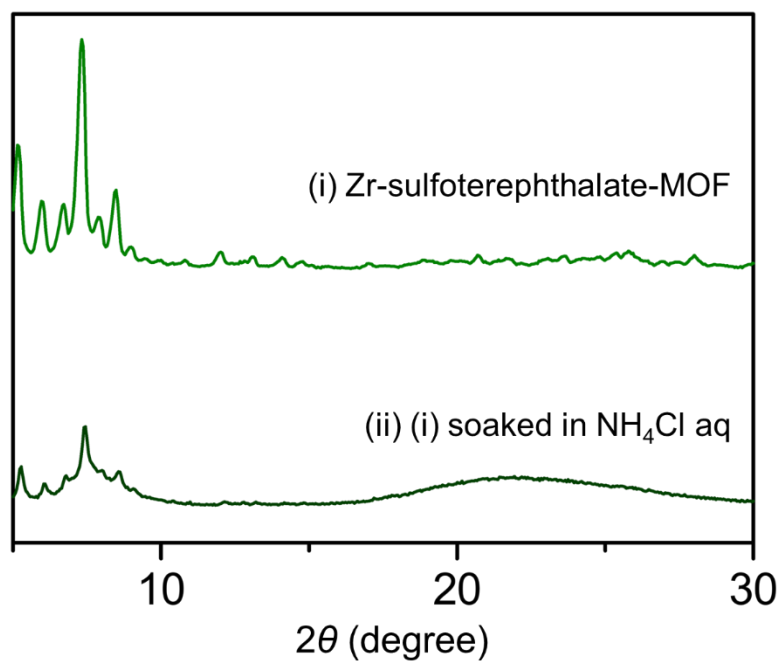

**Fig. S9** PXRD patterns of zirconium sulfoterephthalate MOF (i) before and (ii) after soaked in NH<sub>4</sub>Cl aqueous solutions.

## 8. SEM-EDX Analysis

SEM-EDX analysis was performed using a JEOL Ltd. JSM-7800F. The measurements were carried out at an acceleration voltage of 10 keV and a working distance of 10 mm. Samples were placed on carbon tape on an aluminum stage and coated with ~2 nm of osmium.

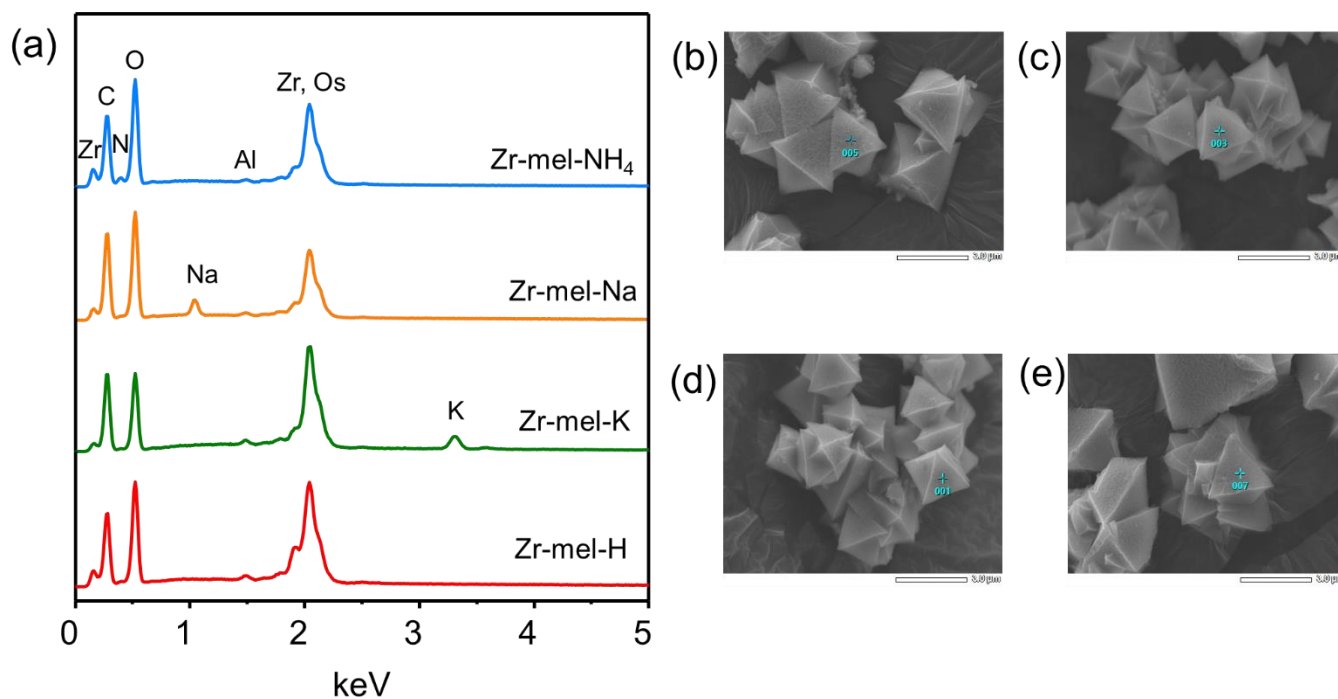

**Fig. S10** (a) EDX spectra of Zr-mel-X (X = NH<sub>4</sub>, Na, K, and H). The spectra were obtained at the spotted position of (b) Zr-mel-NH<sub>4</sub>, (c) Zr-mel-Na, (d) Zr-mel-K, and (e) Zr-mel-H.

## 9. Ion-Exchange Study

ca. 100 mg of pristine Zr-mel-NH<sub>4</sub> was added to 40 mL (pH 1) of hydrochloric acid. The suspension was stirred at 30 °C for 60 min. After stirring, the supernatant and the powder were separated by centrifugation at 4000 rpm for 10 min before filtration with a 45 μm membrane filter. The amount of released ammonium ion into the solution was evaluated using ion chromatography (IC, 883 Basic IC plus; Metrohm). 20 mg of Zr-mel-H or pristine Zr-mel-NH<sub>4</sub> were added to a 20 mL (30 mM) aqueous solution of ammonium chloride, sodium chloride, potassium chloride, and the mixture of these salt. These suspensions were proceeded with a similar method as above and evaluated for each cation concentration. The reversibility of ion exchange between proton and ammonium cations was investigated by repeating the ion exchange test.

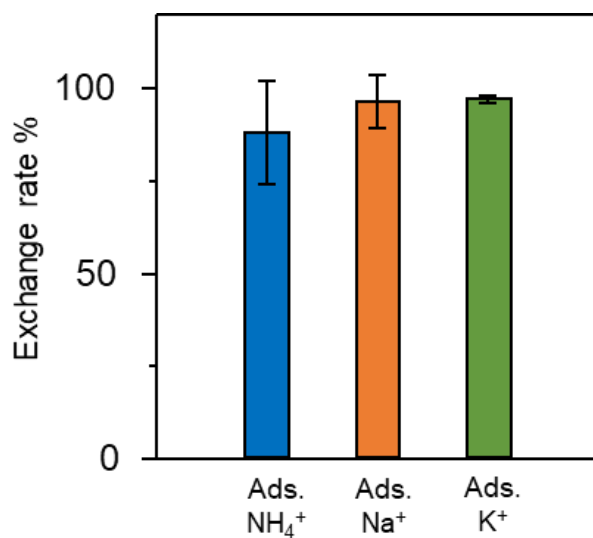

**Fig. S11** The exchange rate from H<sup>+</sup> to NH<sub>4</sub><sup>+</sup>, Na<sup>+</sup>, and K<sup>+</sup>. (Initial concentration of NH<sub>4</sub>Cl, NaCl, and KCl = 30 mM)

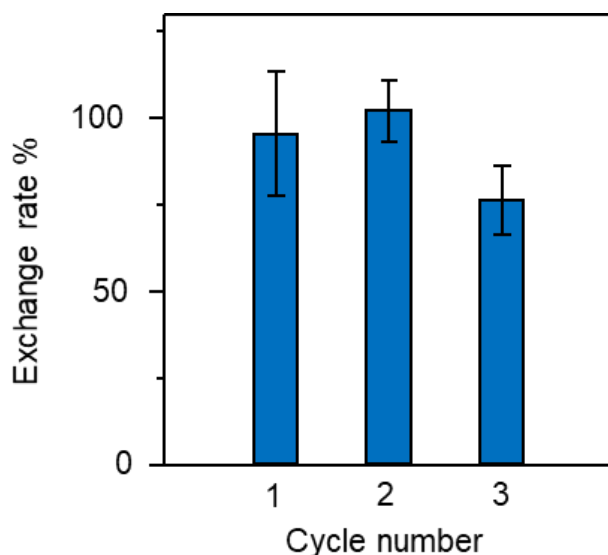

**Fig. S12.** The repeatability of adsorbing NH<sub>4</sub><sup>+</sup> by Zr-mel-H. (Initial concentration of NH<sub>4</sub>Cl = 30 mM, pH 1 HCl)

## 9. PXRD Patterns After Ion-Exchange Experiment

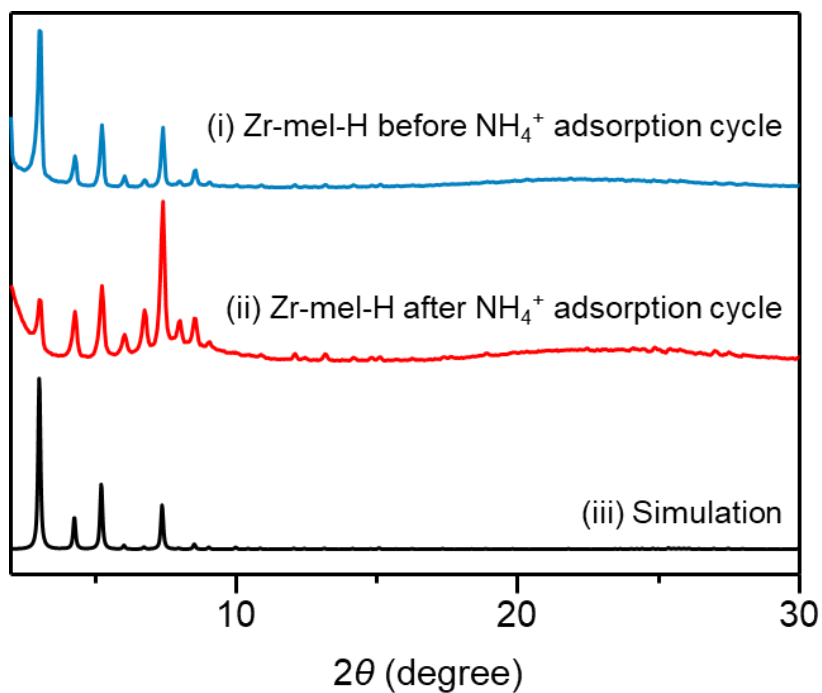

**Fig. S13** PXRD patterns of Zr-mel-H after three cycles of  $\text{NH}_4^+$  adsorption and desorption. After  $\text{NH}_4$  adsorption, the intensity of the first peak in (ii) decreases due to the incorporation of guests, i.e. water, and Y axis of it was magnified. The additional peaks observed in (ii) locates the diffraction angles where the original crystal could have the intensity, indicating change of intensity by the guest introduction.

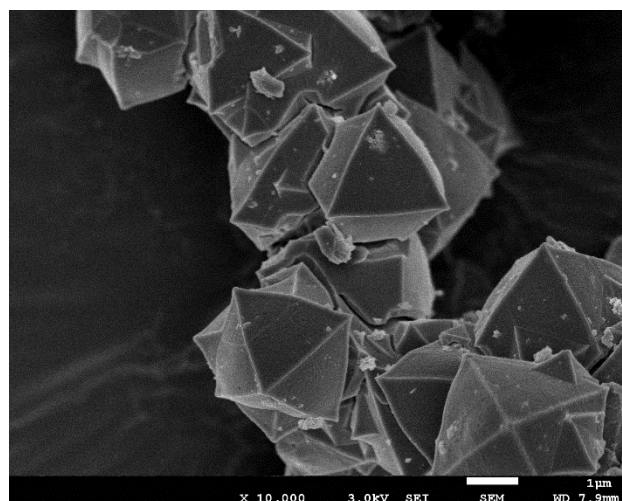

**Fig. S14** SEM images of Zr-mel- $\text{NH}_4$  after soaked three times each in pH 1 HCl and 30 mM aqueous  $\text{NH}_4\text{Cl}$  solution.

## 9. Ion-Exchange Study

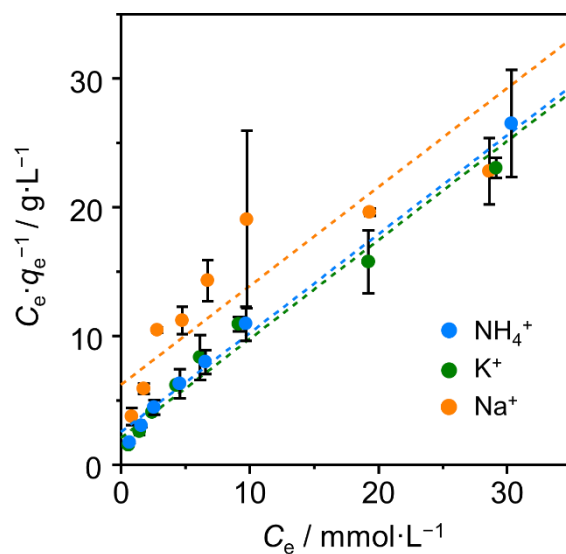

**Fig. S15** Langmuir plot for Zr-mel-H to  $\text{NH}_4^+$ ,  $\text{K}^+$ , and  $\text{Na}^+$  cations.

**Table S4.** The equilibrium constant  $K$  and coefficient of determination  $R^2$  for Zr-mel-H to various cations in aqueous solutions.

|                 | $K/\text{L}\cdot\text{mol}^{-1}$ | $R^2$ |
|-----------------|----------------------------------|-------|
| $\text{NH}_4^+$ | 0.32                             | 0.990 |
| $\text{Na}^+$   | 0.12                             | 0.821 |
| $\text{K}^+$    | 0.34                             | 0.974 |

To evaluate the selectivity for  $\text{NH}_4^+$  and  $\text{K}^+$ , Zr-mel-H was soaked in the mixed solution of  $\text{NH}_4\text{Cl}$  and  $\text{KCl}$  ( $\text{NH}_4^+:\text{Na}^+ = 30:30/\text{mM}$ ).

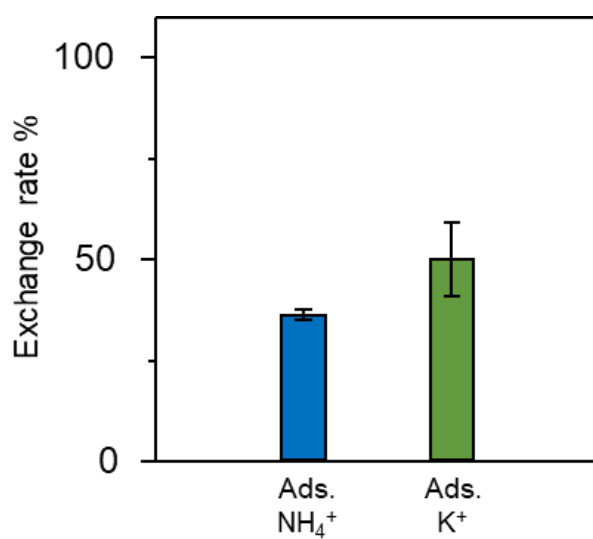

**Fig. S16** The exchange rate of ammonium and potassium cations.



## 10. Proton Conductivity

The powder was pelletized by pressing in a cylindrical die (1 cm diameter, about 1 mm thickness) at ca. 0.3 GPa for 60 seconds. The resistance was estimated from the equivalent circuit fitting of the Nyquist plots. Proton conductivity was calculated with  $\sigma = (1/R) (t/a)$ , where  $\sigma$  is conductivity,  $R$  is the resistance inside the MOF, and  $t$  and  $a$  are the thickness and area of the pellet, respectively. AC impedance measurement was performed using a 1260 Impedance/Gain-Phase Analyzer (Solartron) with a temperature and humidity chamber IW222 (Yamato) from 10 MHz–10 Hz. Humidity dependency from 30 to 95%RH was investigated at 25 °C. Temperature dependency from 15 to 55 °C was investigated at 95%RH. AC impedance was measured after waiting at least 90 min after reaching the target humidity or temperature. Water vapor adsorption analysis was performed at 298 K by a similar setup using ultra-pure water-treated freeze-pump-thaw cycling.

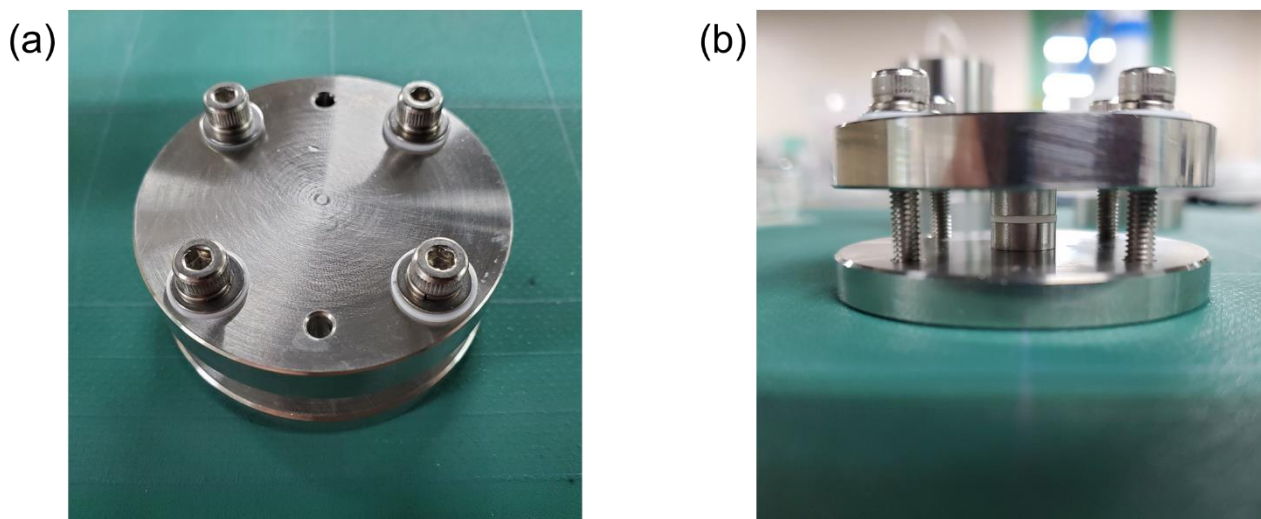

**Fig. S17** The measurement cell for the proton conductivity. (a) front view and (b) side view.

## 10. Proton Conductivity (continued)

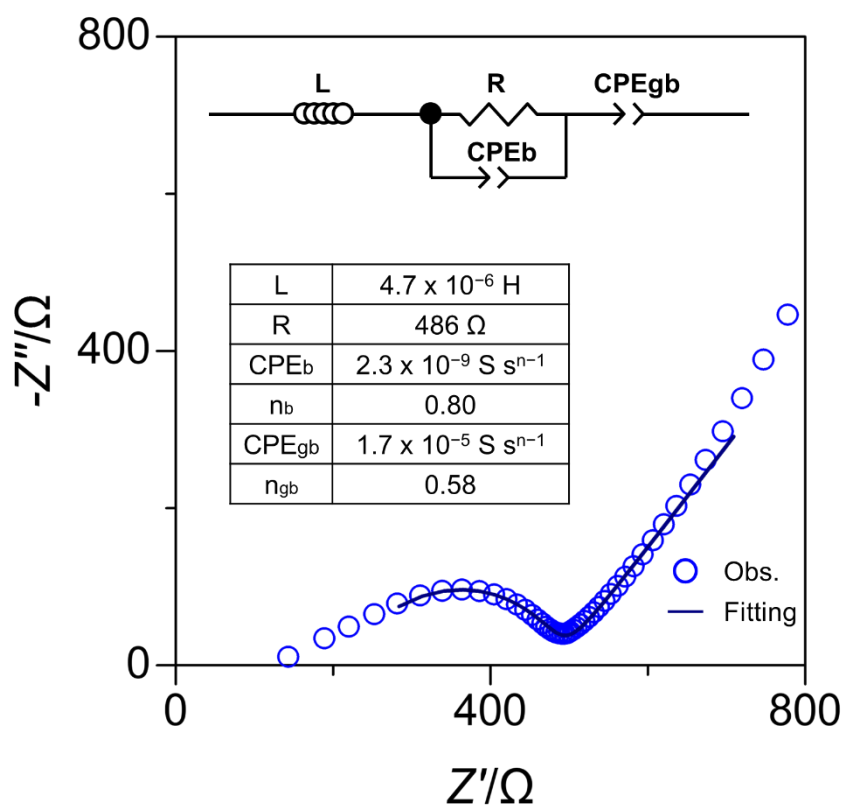

**Fig. S18** An example of the equivalent circuit fitting of a Nyquist plot. The data was obtained by AC impedance measurement of Zr-mel-NH<sub>4</sub> at 15 °C and 95%RH.

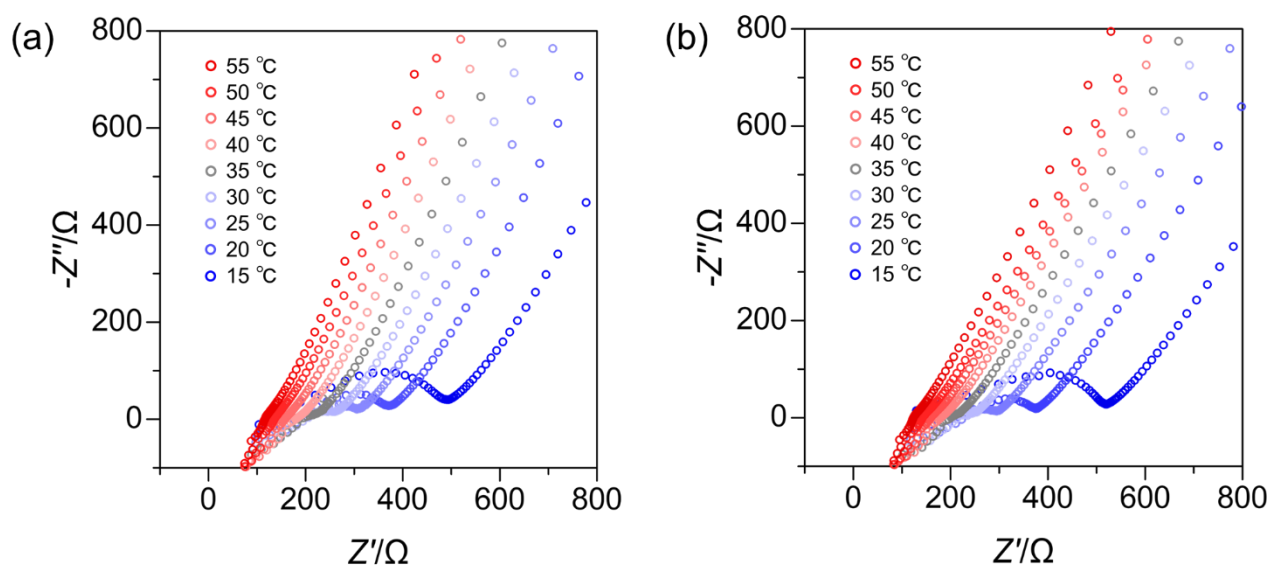

**Fig. S19** Nyquist plots of (a) Zr-mel-NH<sub>4</sub> and (b) Zr-mel-H under 95%RH at variable temperature.

## 10. Proton Conductivity (continued)

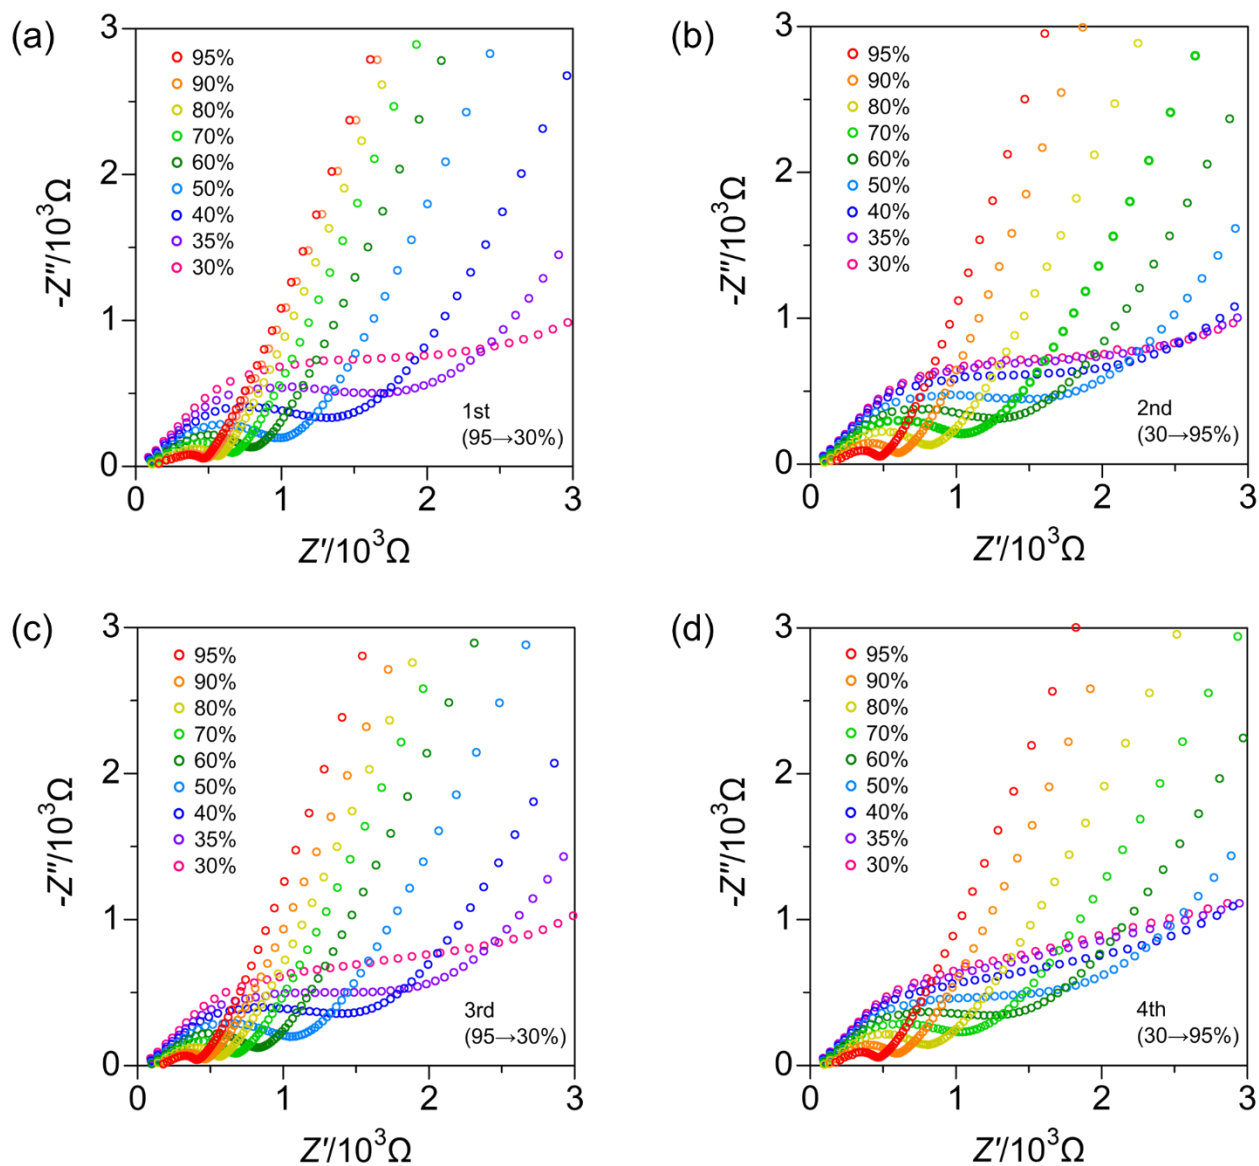

**Fig. S20** Nyquist plots of Zr-mel-NH<sub>4</sub> at 25 °C under variable humidity. (a) 1st cycle (from 95 to 30%), (b) 2nd cycle (from 30 to 95%), (c) 3rd cycle (from 95 to 30%), (d) 4th cycle (from 30 to 95%).

## 10. Proton Conductivity (continued)

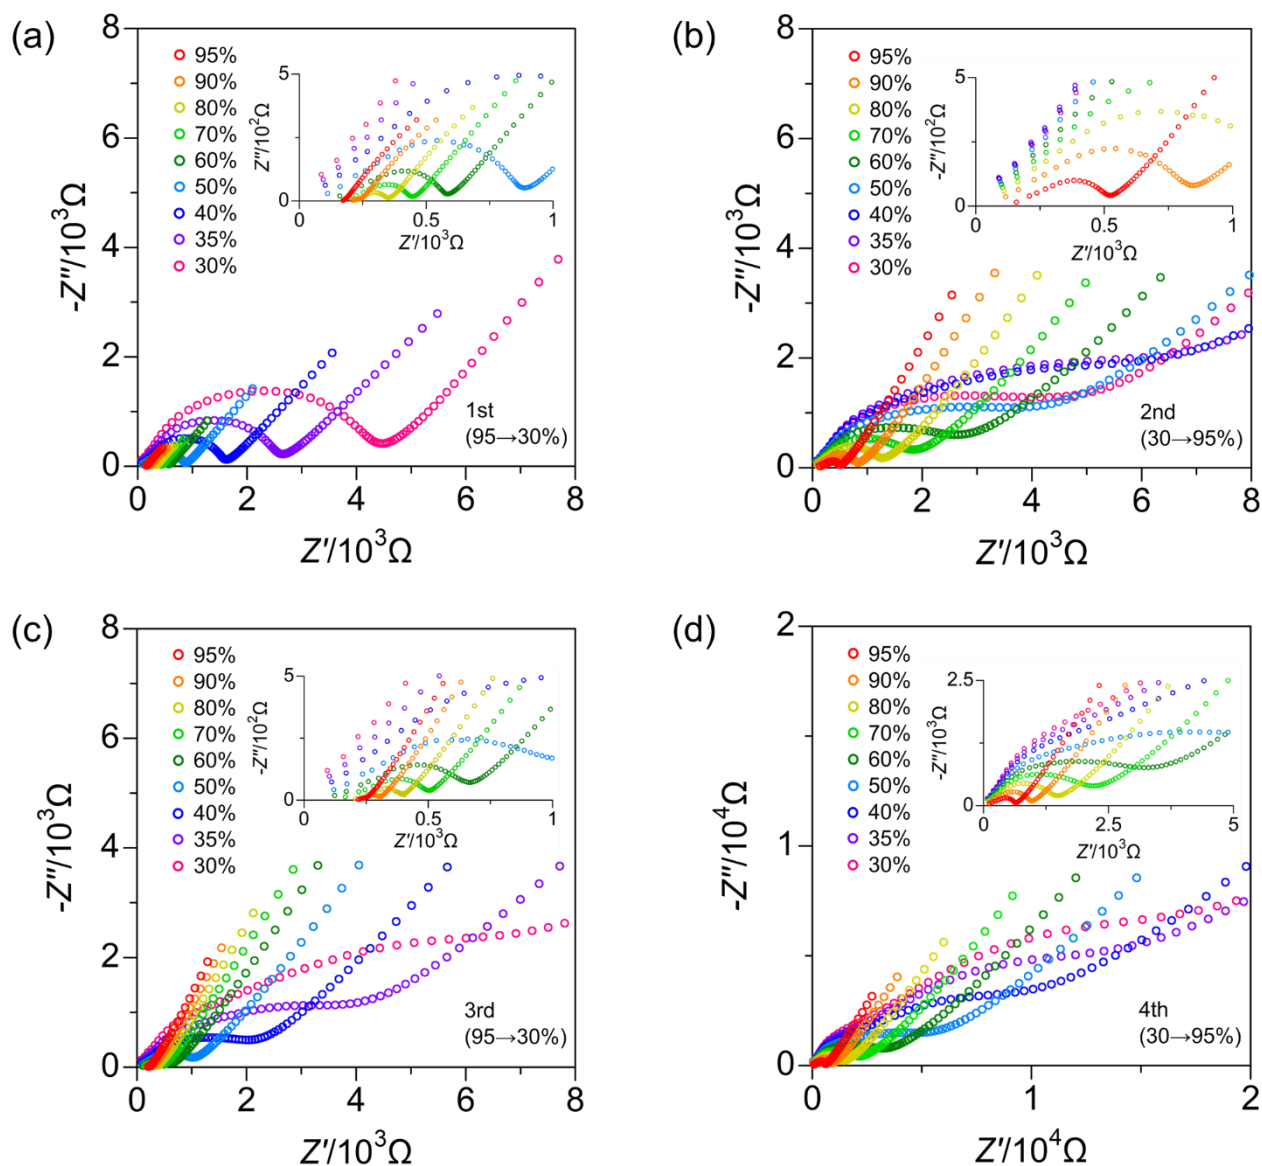

**Fig. S21** Nyquist plots of Zr-mel-H at 25 °C under variable humidity. (a) 1st cycle (from 95 to 30%), (b) 2nd cycle (from 30 to 95%), (c) 3rd cycle (from 95 to 30%), (d) 4th cycle (from 30 to 95%).

## 10. Proton Conductivity (continued)

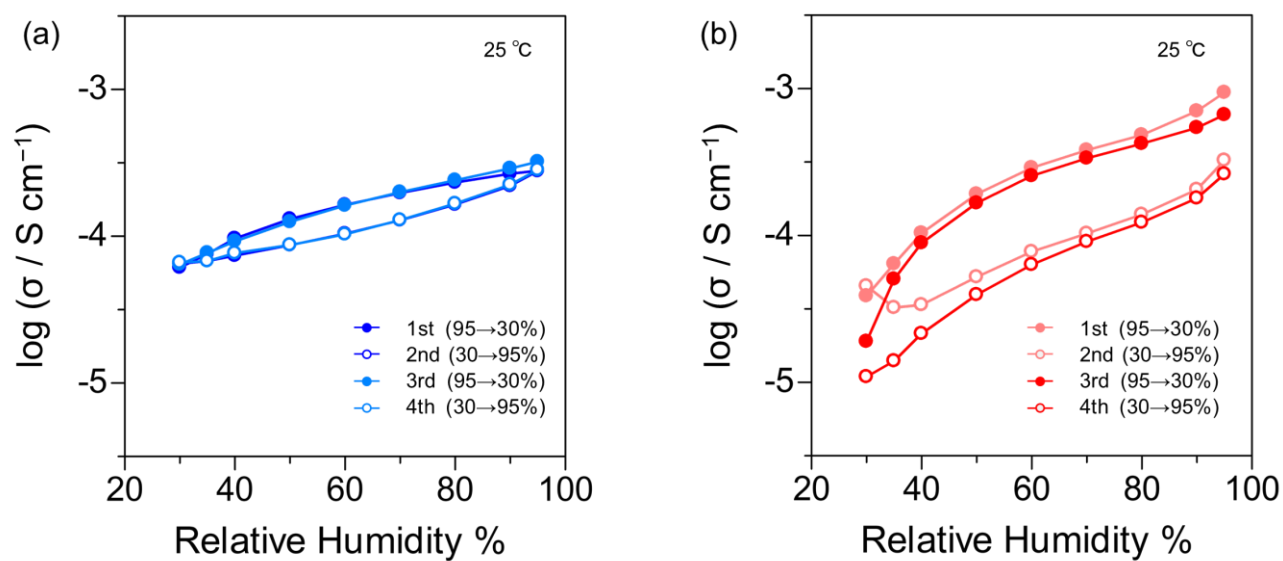

**Fig. S22** Humidity dependency of proton conductivity of (a) Zr-mel-NH<sub>4</sub> and (b) Zr-mel-H.

## 10. PXRD Patterns After Proton Conductivity Measurement Condition

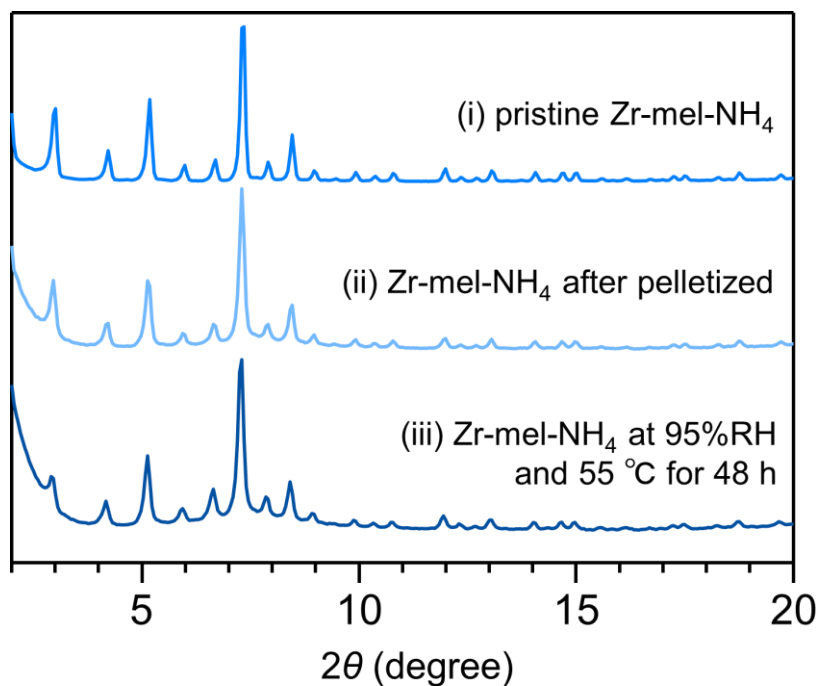

**Fig. S23** PXRD patterns of (i) pristine Zr-mel-NH<sub>4</sub>, (ii) Zr-mel-NH<sub>4</sub> after pelletized and (iii) that being placed at proton conductivity measurement condition.

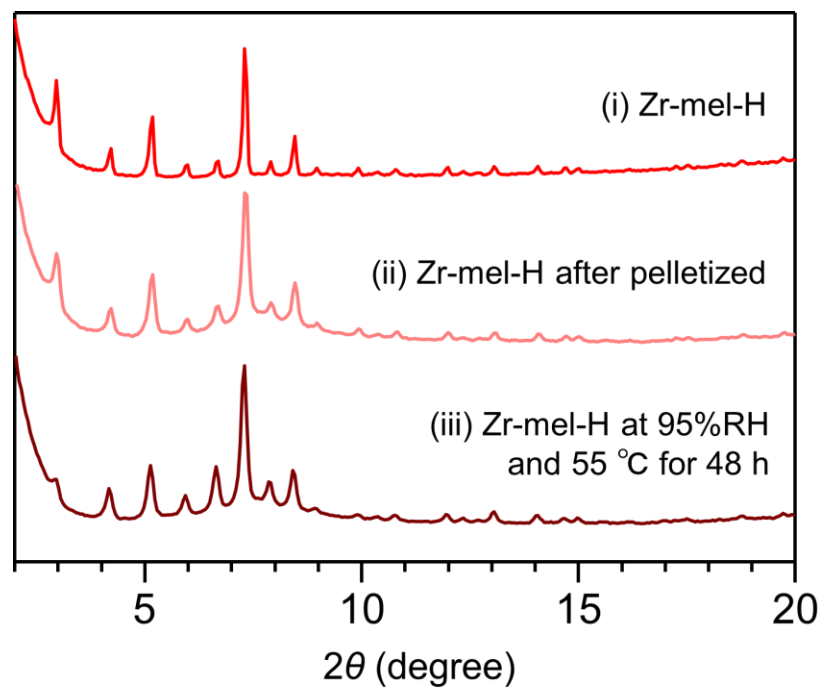

**Fig. S24** PXRD patterns of (i) pristine Zr-mel-H, (ii) Zr-mel-H after pelletized and (iii) that being placed at proton conductivity measurement condition

## References

- S1 G. M. Sheldrick, *Acta Crystallogr. Sect. A Found. Crystallogr.*, 2015, **71**, 3–8.
- S2 G. M. Sheldrick, *Acta Crystallogr. Sect. C Struct. Chem.*, 2015, **71**, 3–8.
- S3 Z. Hu, Y. Peng, Z. Kang, Y. Qian and D. Zhao, *Inorg. Chem.*, 2015, **54**, 4862–4868.
- S4 Q. Yang, S. Vaesen, F. Ragon, A. D. Wiersum, D. Wu, A. Lago, T. Devic, C. Martineau, F. Taulelle, P. L. Llewellyn, H. Jovic, C. Zhong, C. Serre, G. De Weireld and G. Maurin, *Angew. Chemie - Int. Ed.*, 2013, **52**, 10316–10320.
- S5 P. Zhao, N. Liu, C. Jin, H. Chen, Z. Zhang, L. Zhao, P. Cheng and Y. Chen, *Inorg. Chem.*, 2019, **58**, 8787–8792.
- S6 J. M. Taylor, T. Komatsu, S. Dekura, K. Otsubo, M. Takata and H. Kitagawa, *J. Am. Chem. Soc.*, 2015, **137**, 11498–11506.
